# Supplementary material for: Triple Bioluminescence Imaging for In Vivo Monitoring of Cellular Processes
Source: PubMed Central journal article supplement — Mol Ther Nucleic Acids. 2013 Jun 18;2(6):e99–. doi: 10.1038/mtna.2013.25 (PMC3696905; doi:10.1038/mtna.2013.25), 2013-06-18
Supplement: mtna201325x1.pdf [file mtna201325x1.pdf]

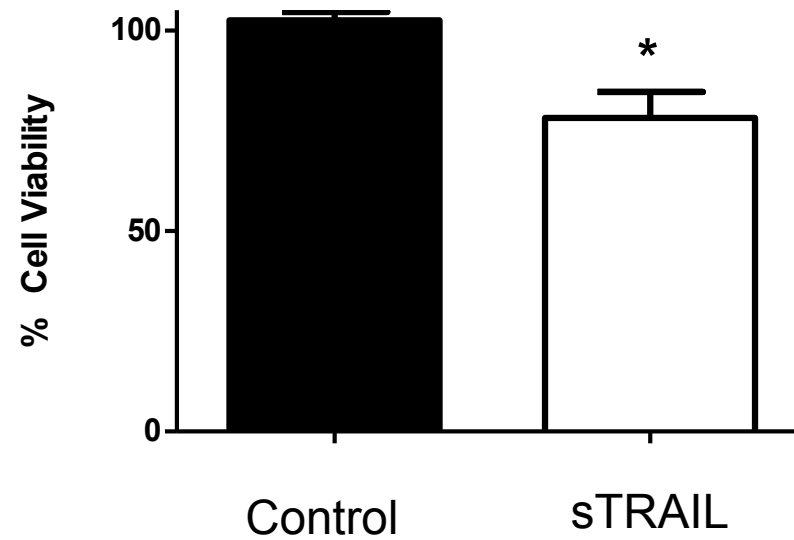

**Supplementary Figure S1. U87 glioma cells are moderately sensitive to killing by conditioned media from donor cells transduced with AAV-sTRAIL.** U87 cells were transduced with AAV2-sTRAIL or AAV2-GFP (control) and two days later, conditioned media was transferred to newly cultured U87 cells. 48 hours later, cell viability was assayed using the commercially available CellTiter-Glo® kit (Promega).
