# Supplementary material for: Triple Bioluminescence Imaging for In Vivo Monitoring of Cellular Processes
Source: PubMed Central journal article supplement — Mol Ther Nucleic Acids. 2013 Jun 18;2(6):e99–. doi: 10.1038/mtna.2013.25 (PMC3696905; doi:10.1038/mtna.2013.25), 2013-06-18
Supplement: mtna201325x2.pdf [file mtna201325x2.pdf]

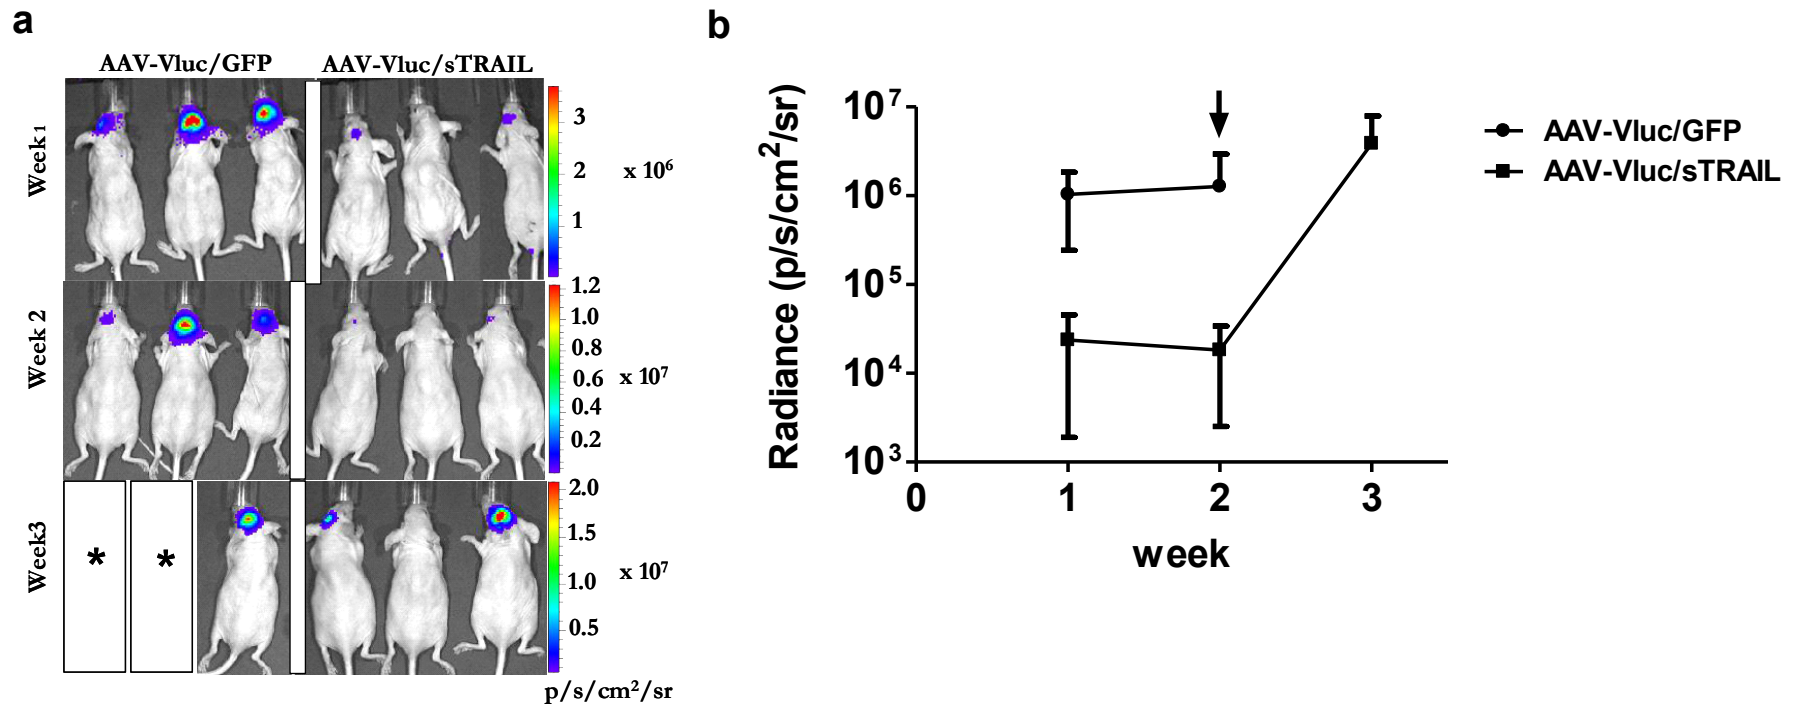

**Supplementary Figure S2. Effect of AAV-sTRAIL vector in mice bearing U87 glioma tumors.**  $10^5$  U87-Fluc/NF-Gluc cells were implanted intracranially and 19 days later, mice were randomized into two groups ( $n=5$ /group) and infused into the same injection site as tumor with either AAV-Vluc/GFP or AAV-Vluc/sTRAIL. **(a)** Mice were imaged weekly over 3 weeks post-vector injection. Representative mice are shown for both groups at each time point. Star represents control AAV-Vluc/GFP mice which were sacrificed due to tumor burden. Note the different bioluminescent signal scale for each imaging time point in order to show tumor location. **(b)** Quantitation of tumor-associated Fluc signal in mice from (a). The arrow indicates mice sacrifice at week 2 post-vector injection due to tumor size.
